# Supplementary material for: Fermi level equilibration of Ag and Au plasmonic metal nanoparticles supported on graphene oxide
Source: Royal Society of Chemistry journal article supplement (doi:10.1039/c8cp05170d), 2018-01-01
Supplement: c8cp05170d1.xlsx [file c8cp05170d1.xlsx]

## Sheet: Sheet1
Params	Ag NPS	Ag@rGO NPs	Au NPs	Au@rGO NPs
λ_i (nm)	430	412	527	537
λ_f (nm)	402	392	525	531
Δλ (nm)	28	20	2	6
V_m (cm3*mol-1)	10.28	10.28	10.21	10.21
r (nm)	52	11	33	11
C (Farad*cm-2*g-1)	0.283	0.476	0.205	0.675
ΔΕ (mV)	-1810.7	-171.223	-96.0367	-28.5178
ratio: excel/MS value	0.999283	1.00131	1.00038	0.983372
